# Supplementary material
Source: PubMed Central journal article supplement (PMC5744657)
Supplement: EHP658.s001.acco.pdf [file EHP658.s001.acco.pdf]

**Note to readers with disabilities:** *EHP* strives to ensure that all journal content is accessible to all readers. However, some figures and Supplemental Material published in *EHP* articles may not conform to [508 standards](#) due to the complexity of the information being presented. If you need assistance accessing journal content, please contact [ehponline@niehs.nih.gov](mailto:ehponline@niehs.nih.gov). Our staff will work with you to assess and meet your accessibility needs within 3 working days.

## **Supplemental Material**

### **Ambient Coarse Particulate Matter and the Right Ventricle:**

#### **The Multi-Ethnic Study of Atherosclerosis**

Jennifer D'Souza, Steven Kawut, Laura R. Elkayam, Lianne Sheppard, Peter S. Thorne, David R. Jacobs, Jr, David A. Bluemke, Joao A. Lima, Joel D. Kaufman, Timothy V. Larson, and Sara D. Adar

#### **Table of Contents**

**Figure S1.** Study Population

**Table S1.** Comparison of Full Cohort with Included and Excluded samples

**Table S2.** Pearson Correlation Coefficients between different pollutants: overall and within study site

**Figure S2.** Associations Between Air Pollutant Concentrations and Right Ventricular End-Diastolic Mass in Single and Multi-Pollutant Models (g per IQR of Pollutant, 95% CI)

**Figure S3.** Sensitivity of Results to Adjustment for Various Covariates Including Potential Intermediates

**Figure S4.** Effect Modification of Associations Between  $PM_{10-2.5}$  Concentrations and Right Ventricular End-Diastolic Volume and Ejection Fraction, After Control for  $PM_{2.5}$  and  $NO_2$  (g per IQR of Pollutant, 95% CI)

**Figure S1. Study Population**

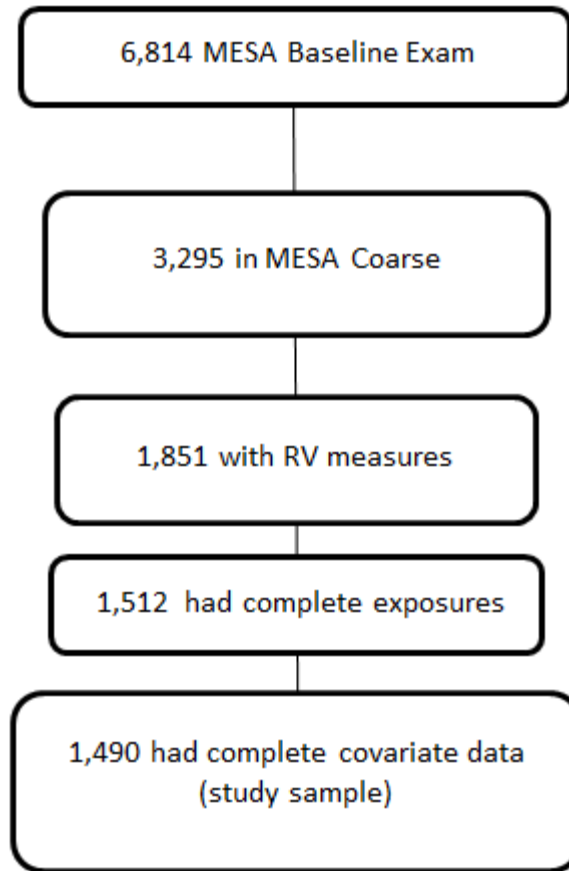

**Table S1. Comparison of Full Cohort with Included and Excluded samples**

|                                           | <b>Full</b> | <b>Included</b> | <b>Excluded</b> |
|-------------------------------------------|-------------|-----------------|-----------------|
| N                                         | 3295        | 1490            | 1805            |
| Age (years)                               | 61.8±10.2   | 61.1±10.0       | 62.3±10.3       |
| Female                                    | 1726 (52%)  | 795 (53%)       | 931 (52%)       |
| Race/Ethnicity                            |             |                 |                 |
| White                                     | 1731 (53%)  | 828 (56%)       | 903 (50%)       |
| Chinese                                   | 304 (9%)    | 158 (11%)       | 146 (8%)        |
| Black                                     | 801 (24%)   | 293 (20%)       | 508 (28%)       |
| Hispanic                                  | 459 (14%)   | 211 (14%)       | 248 (14%)       |
| Education                                 |             |                 |                 |
| <High School                              | 922 (28%)   | 400 (27%)       | 522 (29%)       |
| High School/Some College                  | 992 (30%)   | 440 (30%)       | 552 (31%)       |
| ≥College                                  | 1377 (42%)  | 650 (44%)       | 727 (40%)       |
| Smoking Status                            |             |                 |                 |
| Never                                     | 1543 (47%)  | 744 (50%)       | 799 (44%)       |
| Former                                    | 1302 (40%)  | 556 (37%)       | 746 (41%)       |
| Current                                   | 446 (14%)   | 190 (13%)       | 256 (14%)       |
| ≥ 10 years in neighborhood                | 2115 (64%)  | 1033 (69%)      | 1082 (60%)      |
| <b>Health</b>                             |             |                 |                 |
| BMI (kg/m <sup>2</sup> )                  | 28.3±5.4    | 27.7±5.0        | 28.8±5.6        |
| Cholesterol (mg/dl)                       | 194.3±35.4  | 195.3±36.0      | 193.5±34.9      |
| Hypertension                              | 1407 (43%)  | 584 (39%)       | 823 (46%)       |
| Diabetic                                  | 347 (11%)   | 143 (10%)       | 204 (11%)       |
| <b>Pollutants, mean (SD)</b>              |             |                 |                 |
| PM <sub>10-2.5</sub> (µg/m <sup>3</sup> ) | 5.0±1.7     | 4.9±1.6         | 5.1±1.7         |
| Copper (ng/m <sup>3</sup> )               | 4.6±2.7     | 4.4±2.5         | 4.8±2.8         |
| Zinc (ng/m <sup>3</sup> )                 | 10.0±10.7   | 9.0±9.6         | 11.0±11.6       |
| Silicon (µg/m <sup>3</sup> )              | 0.4±0.1     | 0.4±0.1         | 0.4±0.1         |
| Phosphorous (ng/m <sup>3</sup> )          | 16.2±3.7    | 15.9±3.6        | 16.5±3.8        |
| Endotoxin (EU/m <sup>3</sup> )            | 0.1±0.1     | 0.1±0.1         | 0.1±0.1         |
| PM <sub>2.5</sub> (µg/m <sup>3</sup> )    | 14.7±2.2    | 14.6±2.1        | 14.8±2.2        |
| NO <sub>2</sub> (ppb)                     | 15.0±5.4    | 14.7±5.1        | 15.2±5.6        |

Excluded refers to those who were in the MESA Coarse study but were missing exposure, outcome and/or covariates used in the main model

**Table S2. Pearson Correlation Coefficients between different pollutants: overall and within study site**

(p values are printed below Pearson Correlation Coefficients)

**Overall**

|                      | PM <sub>10-2.5</sub> | Cu              | Zn              | Ph              | Si              | Endo            | PM <sub>2.5</sub> | NO <sub>2</sub> |
|----------------------|----------------------|-----------------|-----------------|-----------------|-----------------|-----------------|-------------------|-----------------|
| PM <sub>10-2.5</sub> | 1                    |                 |                 |                 |                 |                 |                   |                 |
| Cu                   | 0.53<br><.0001       | 1               |                 |                 |                 |                 |                   |                 |
| Zn                   | 0.45<br><.0001       | 0.79<br><.0001  | 1               |                 |                 |                 |                   |                 |
| Ph                   | -0.09<br>0.0003      | 0.04<br>0.09    | 0.10<br><.0001  | 1               |                 |                 |                   |                 |
| Si                   | 0.53<br><.0001       | 0.16<br><.0001  | 0.08<br>0.00    | -0.13<br><.0001 | 1               |                 |                   |                 |
| Endo                 | 0.16<br><.0001       | -0.30<br><.0001 | -0.27<br><.0001 | -0.46<br><.0001 | 0.27<br><.0001  | 1               |                   |                 |
| PM <sub>2.5</sub>    | 0.02<br>0.38         | 0.46<br><.0001  | 0.42<br><.0001  | 0.57<br><.0001  | -0.28<br><.0001 | -0.61<br><.0001 | 1                 |                 |
| NO <sub>2</sub>      | 0.52<br><.0001       | 0.89<br><.0001  | 0.76<br><.0001  | -0.07<br>0.01   | 0.19<br><.0001  | -0.24<br><.0001 | 0.46<br><.0001    | 1               |

**Chicago**

|                      | PM <sub>10-2.5</sub> | Cu              | Zn             | Ph              | Si              | Endo            | PM <sub>2.5</sub> | NO <sub>2</sub> |
|----------------------|----------------------|-----------------|----------------|-----------------|-----------------|-----------------|-------------------|-----------------|
| PM <sub>10-2.5</sub> | 1                    |                 |                |                 |                 |                 |                   |                 |
| Cu                   | 0.80<br><.0001       | 1               |                |                 |                 |                 |                   |                 |
| Zn                   | 0.74<br><.0001       | 0.56<br><.0001  | 1              |                 |                 |                 |                   |                 |
| Ph                   | 0.78<br><.0001       | 0.73<br><.0001  | 0.65<br><.0001 | 1               |                 |                 |                   |                 |
| Si                   | 0.84<br><.0001       | 0.77<br><.0001  | 0.57<br><.0001 | 0.79<br><.0001  | 1               |                 |                   |                 |
| Endo                 | -0.14<br>0.00        | -0.21<br><.0001 | -0.08<br>0.07  | -0.30<br><.0001 | -0.31<br><.0001 | 1               |                   |                 |
| PM <sub>2.5</sub>    | 0.58<br><.0001       | 0.51<br><.0001  | 0.38<br><.0001 | 0.60<br><.0001  | 0.59<br><.0001  | -0.26<br><.0001 | 1                 |                 |
| NO <sub>2</sub>      | 0.79<br><.0001       | 0.75<br><.0001  | 0.57<br><.0001 | 0.65<br><.0001  | 0.75<br><.0001  | -0.16<br>0.00   | 0.62<br><.0001    | 1               |

**Winston-Salem**

|                      | PM <sub>10-2.5</sub> | Cu              | Zn              | Ph             | Si             | Endo            | PM <sub>2.5</sub> | NO <sub>2</sub> |
|----------------------|----------------------|-----------------|-----------------|----------------|----------------|-----------------|-------------------|-----------------|
| PM <sub>10-2.5</sub> | 1                    |                 |                 |                |                |                 |                   |                 |
| Cu                   | 0.05<br>0.31         | 1               |                 |                |                |                 |                   |                 |
| Zn                   | -0.29<br><.0001      | 0.25<br><.0001  | 1               |                |                |                 |                   |                 |
| Ph                   | 0.32<br><.0001       | 0.24<br><.0001  | 0.08<br>0.10    | 1              |                |                 |                   |                 |
| Si                   | 0.51<br><.0001       | 0.57<br><.0001  | 0.13<br>0.01    | 0.31<br><.0001 | 1              |                 |                   |                 |
| Endo                 | 0.36<br><.0001       | -0.37<br><.0001 | -0.53<br><.0001 | -0.17<br>0.00  | -0.12<br>0.01  | 1               |                   |                 |
| PM <sub>2.5</sub>    | -0.36<br><.0001      | 0.41<br><.0001  | 0.30<br><.0001  | -0.03<br>0.51  | 0.05<br>0.30   | -0.36<br><.0001 | 1                 |                 |
| NO <sub>2</sub>      | -0.15<br>0.00        | 0.64<br><.0001  | 0.52<br><.0001  | 0.04<br>0.40   | 0.35<br><.0001 | -0.33<br><.0001 | 0.60<br><.0001    | 1               |

**St.Paul**

|                      | PM <sub>10-2.5</sub> | Cu             | Zn             | Ph             | Si              | Endo          | PM <sub>2.5</sub> | NO <sub>2</sub> |
|----------------------|----------------------|----------------|----------------|----------------|-----------------|---------------|-------------------|-----------------|
| PM <sub>10-2.5</sub> | 1                    |                |                |                |                 |               |                   |                 |
| Cu                   | 0.56<br><.0001       | 1              |                |                |                 |               |                   |                 |
| Zn                   | 0.28<br><.0001       | 0.51<br><.0001 | 1              |                |                 |               |                   |                 |
| Ph                   | 0.18<br><.0001       | 0.36<br><.0001 | 0.38<br><.0001 | 1              |                 |               |                   |                 |
| Si                   | 0.45<br><.0001       | 0.41<br><.0001 | 0.36<br><.0001 | 0.46<br><.0001 | 1               |               |                   |                 |
| Endo                 | 0.13<br>0.00         | 0.03<br>0.54   | 0.20<br><.0001 | 0.11<br>0.01   | -0.20<br><.0001 | 1             |                   |                 |
| PM <sub>2.5</sub>    | 0.23<br><.0001       | 0.40<br><.0001 | 0.25<br><.0001 | 0.28<br><.0001 | 0.46<br><.0001  | -0.02<br>0.60 | 1                 |                 |
| NO <sub>2</sub>      | 0.41<br><.0001       | 0.63<br><.0001 | 0.46<br><.0001 | 0.35<br><.0001 | 0.49<br><.0001  | 0.01<br>0.76  | 0.81<br><.0001    | 1               |

**Figure S2. Associations Between Air Pollutant Concentrations and Right Ventricular End-Diastolic Mass in Single and Multi-Pollutant Models (g per IQR of Pollutant, 95% CI)**

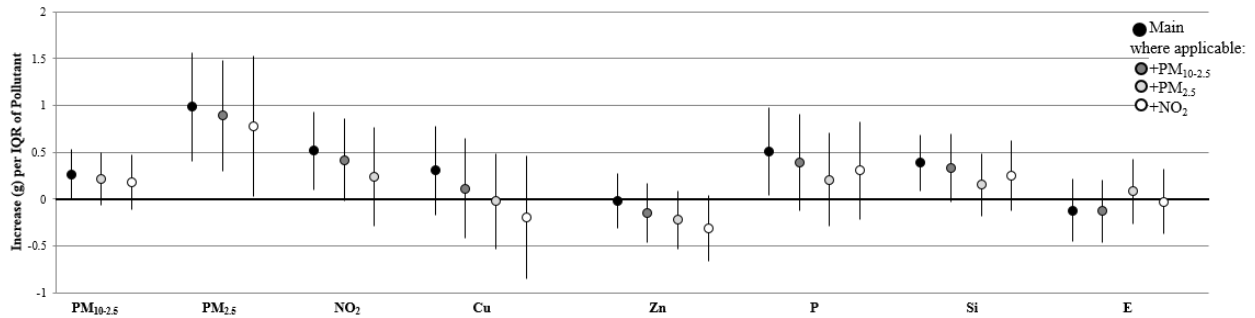

All models adjusted for age, race, gender, height, weight, NSES, education, smoking status, pack-years, second-hand smoke exposure, hypertension, diabetes, total cholesterol, study site, and site by NSES interaction.  
 Associations scaled to IQR of pollutant: PM<sub>10-2.5</sub> (2.2 µg/m<sup>3</sup>), PM<sub>2.5</sub> (3.8 µg/m<sup>3</sup>), NO<sub>2</sub> (7.0 ppb), Cu (4 ng/m<sup>3</sup>), Zn (11 ng/m<sup>3</sup>), P (6 ng/m<sup>3</sup>), Si (0.13 µg/m<sup>3</sup>), Endotoxin (0.08 EU/m<sup>3</sup>).

**Figure S3. Sensitivity of Results to Adjustment for Various Covariates Including Potential Intermediates**

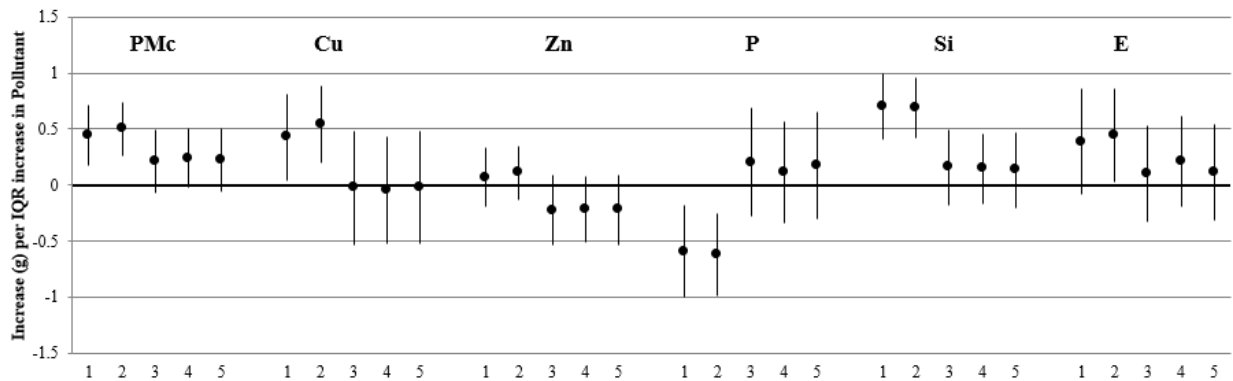

Above models are presented with increasing levels of adjustment in the following order:

- 1: Age, race, gender, NSES, education, PM<sub>2.5</sub>
- 2: Model 1 + height, weight, smoking status, pack-years, second-hand smoke exposure, hypertension, diabetes, total cholesterol
- 3: Model 2 + study site, and site by NSES interaction
- 4: Model 3 + left ventricular mass
- 5: Model 3 + %emphysema

Associations scaled to IQR of pollutant: PM<sub>10-2.5</sub> (2.2 µg/m<sup>3</sup>), Cu (4 ng/m<sup>3</sup>), Zn (11 ng/m<sup>3</sup>), P (6ng/m<sup>3</sup>), Si (0.13 µg/m<sup>3</sup>), Endotoxin (0.1 EU/m<sup>3</sup>).

**Figure S4. Effect Modification of Associations Between PM<sub>10-2.5</sub> Concentrations and Right Ventricular End-Diastolic Volume and Ejection Fraction, After Control for PM<sub>2.5</sub> and NO<sub>2</sub> (g per IQR of Pollutant, 95% CI)**

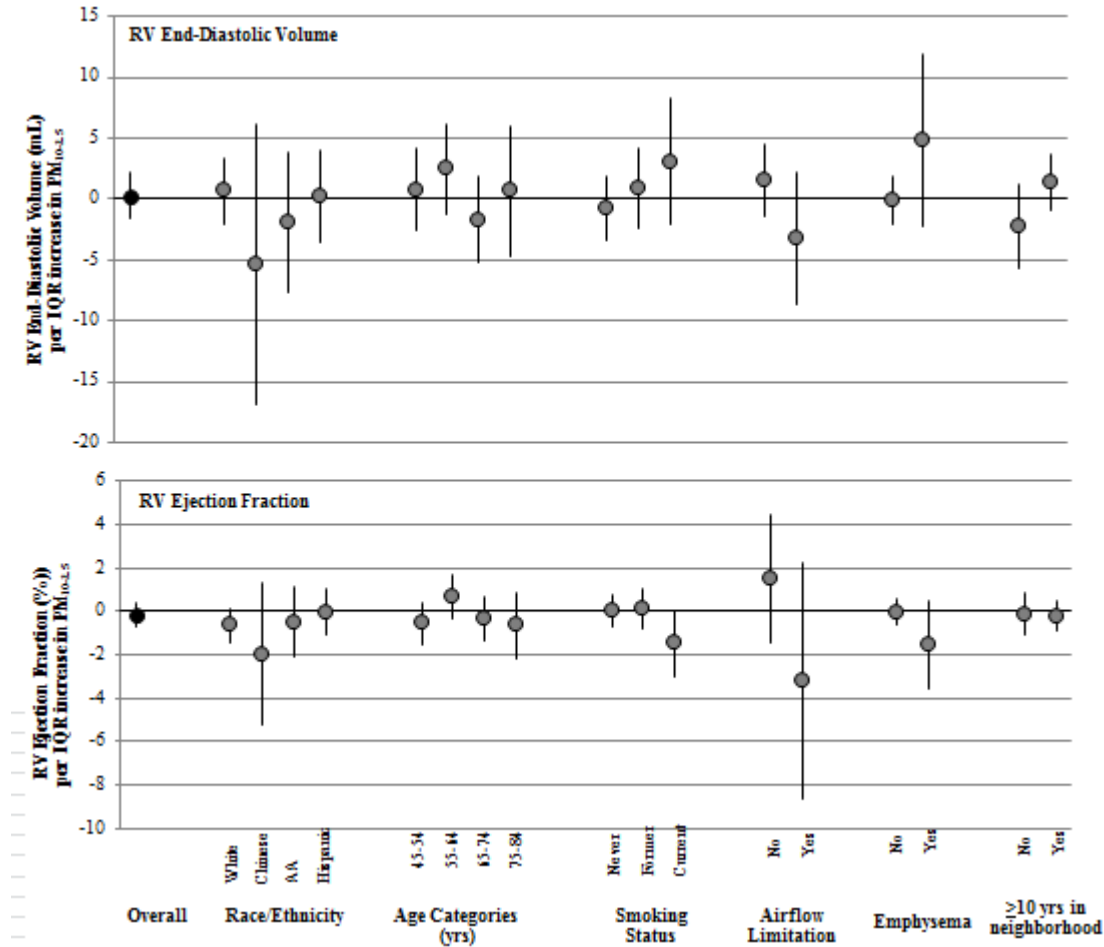

All models adjusted for age, race, gender, height, weight, NSES, education, smoking status, pack-years, second-hand smoke exposure, hypertension, diabetes, total cholesterol, study site, site by NSES interaction, PM<sub>2.5</sub> and NO<sub>2</sub> and their effect modifier interaction. Associations scaled to IQR of pollutant: PM<sub>10-2.5</sub> (2.2 µg/m<sup>3</sup>).
